# Supplementary figures and images for: Astaxanthin attenuates d-galactose-induced brain aging in rats by ameliorating oxidative stress, mitochondrial dysfunction, and regulating metabolic markers
Source: Royal Society of Chemistry journal article supplement (doi:10.1039/d0fo00633e), 2020-01-01

**Fig. 1. Effect of D-galactose on appearance of rats.** (left) the CK group; (right) the D-gal group

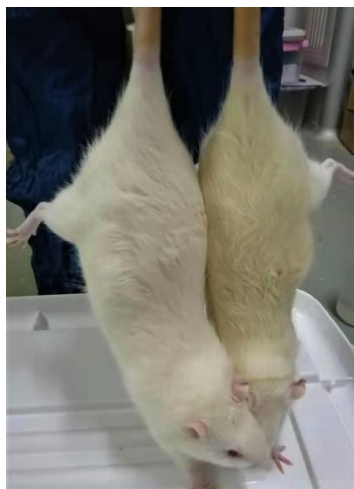

Supplement: d0fo00633e1.pdf [file d0fo00633e1.pdf]
